# Supplementary material for: Developing a typology of models of palliative care delivery in prisons in high-income countries: protocol for a scoping review with narrative synthesis
Source: HighWire-hosted journal article supplement (doi:10.1136/bmjopen-2022-060886), 2022-04-01
Supplement: bmjopen-2022-060886supp001_data_supplement.pdf [file bmjopen-2022-060886supp001_data_supplement.pdf]

## Supplementary Material – MEDLINE search strategy

The preliminary search parameters are English-only published research papers, commentaries and discussions, reviews and policy documents concerning palliative and end-of-life care for the prison population.

| #  | Query                                                                                                 |
|----|-------------------------------------------------------------------------------------------------------|
| 1  | Palliative Care/                                                                                      |
| 2  | Terminal Care/                                                                                        |
| 3  | Death/                                                                                                |
| 4  | Terminally Ill/                                                                                       |
| 5  | Hospice Care/                                                                                         |
| 6  | Pain Management/                                                                                      |
| 7  | Advance Directives/                                                                                   |
| 8  | Advance Care Planning/                                                                                |
| 10 | Palliat*.mp.                                                                                          |
| 11 | end of life.mp.                                                                                       |
| 12 | end of life care.mp.                                                                                  |
| 13 | terminal illness.mp.                                                                                  |
| 14 | dying.mp.                                                                                             |
| 15 | end stage illness.mp.                                                                                 |
| 16 | supportive care.mp.                                                                                   |
| 17 | symptom management.mp.                                                                                |
| 18 | compassionate release.mp.                                                                             |
| 19 | 1 or 2 or 3 or 4 or 5 or 6 or 7 or 8 or 9<br>or 10 or 11 or 12 or 13 or 14 or 15 or<br>16 or 17 or 18 |
| 20 | Prisoners/ or Prisons/                                                                                |
| 21 | Criminals/                                                                                            |
| 22 | Jails/                                                                                                |
| 23 | Incarcerat*.mp.                                                                                       |
| 23 | Correctional Facilities/                                                                              |
| 24 | convict*.mp.                                                                                          |
| 25 | felon*.mp.                                                                                            |
| 26 | offender*.mp.                                                                                         |
| 27 | inmate*.mp.                                                                                           |
| 28 | penitentiary*.mp. [                                                                                   |
| 29 | gaol.mp.                                                                                              |
| 30 | secure.mp.                                                                                            |

|    |                                                                   |
|----|-------------------------------------------------------------------|
| 31 | 20 or 21 or 22 or 23 or 24 or 25 or 26<br>or 27 or 28 or 29 or 30 |
| 32 | 19 and 31                                                         |
