# Supplementary material for: Developing a typology of models of palliative care delivery in prisons in high-income countries: protocol for a scoping review with narrative synthesis
Source: HighWire-hosted journal article supplement (doi:10.1136/bmjopen-2022-060886), 2022-04-01
Supplement: bmjopen-2022-060886supp002_data_supplement.pdf [file bmjopen-2022-060886supp002_data_supplement.pdf]

| <b>CINAHL search strategy</b> |                                                                                                                                   |
|-------------------------------|-----------------------------------------------------------------------------------------------------------------------------------|
| S55                           | S40 AND S54.                                                                                                                      |
| S54                           | S41 OR S42 OR S43 OR S44 OR S45 OR S46 OR S47 OR S48 OR S49 OR S50 OR S51 OR S52 OR S53)                                          |
| S53                           | "secure"                                                                                                                          |
| S52                           | "gaol"                                                                                                                            |
| S51                           | "penitentiary"                                                                                                                    |
| S50                           | "inmate"                                                                                                                          |
| S49                           | "offender"                                                                                                                        |
| S48                           | "felon"                                                                                                                           |
| S47                           | "convict"                                                                                                                         |
| S46                           | (MH "Correctional Facilities")                                                                                                    |
| S45                           | "carcerat"                                                                                                                        |
| S44                           | "Jail"                                                                                                                            |
| S43                           | "Criminal"                                                                                                                        |
| S42                           | (MH "Prisoners")                                                                                                                  |
| S41                           | "Prison"                                                                                                                          |
| S40                           | S21 OR S22 OR S23 OR S24 OR S25 OR S26 OR S27 OR S28 OR S29 OR S30 OR S31 OR S32 OR S33 OR S34 OR S35 OR S36 OR S37 OR S38 OR S39 |
| S39                           | "compassionate release"                                                                                                           |
| S38                           | "symptom management"                                                                                                              |
| S37                           | "supportive care"                                                                                                                 |
| S36                           | "end stage illness"                                                                                                               |
| S35                           | "dying"                                                                                                                           |
| S34                           | dying                                                                                                                             |
| S33                           | "terminal illness"                                                                                                                |
| S32                           | "end-of-life care"                                                                                                                |
| S31                           | "end-of-life"                                                                                                                     |
| S30                           | "Palliat"                                                                                                                         |
| S29                           | (MH "Advance Care Planning")                                                                                                      |
| S28                           | (MH "Advance Directives+")                                                                                                        |

|     |                                 |
|-----|---------------------------------|
| S27 | (MH "Pain Management")          |
| S26 | (MH "Hospice Care")             |
| S25 | Terminally ill                  |
| S24 | (MH "Terminally Ill Patients+") |
| S23 | (MH "Death+")                   |
| S22 | (MH "Terminal Care+")           |
| S21 | (MH "Palliative Care")          |

| <b>EMBASE search strategy</b> |                             |
|-------------------------------|-----------------------------|
| <b>#</b>                      | <b>Query</b>                |
| 1                             | exp palliative therapy/     |
| 2                             | exp terminal care/          |
| 3                             | exp death/                  |
| 4                             | exp terminally ill patient/ |
| 5                             | exp hospice care/           |
| 6                             | "pain management".mp.       |
| 7                             | 'advance directives'.mp.    |
| 8                             | exp advance care planning/  |
| 9                             | Palliat*.mp.                |
| 10                            | "end-of-life".mp.           |
| 11                            | "end-of-life care".mp.      |
| 12                            | exp terminal disease/       |
| 13                            | "terminal illness".mp.      |
| 14                            | exp dying/                  |
| 15                            | "end stage illness".mp.     |
| 16                            | "supportive care".mp.       |
| 17                            | "symptom management".mp.    |
| 18                            | "compassionate release".mp. |

|    |                                                                                                                                                 |
|----|-------------------------------------------------------------------------------------------------------------------------------------------------|
| 19 | Palliative care.mp.                                                                                                                             |
| 20 | Terminal care.mp.                                                                                                                               |
| 21 | death.mp.                                                                                                                                       |
| 22 | terminally ill.mp.                                                                                                                              |
| 23 | hospice care.mp.                                                                                                                                |
| 24 | exp hospice/                                                                                                                                    |
| 25 | advance care planning.mp. or advance care planning/                                                                                             |
| 26 | dying.mp.                                                                                                                                       |
| 27 | prisoner/ or prison/                                                                                                                            |
| 28 | prison.mp.                                                                                                                                      |
| 29 | prisoner.mp.                                                                                                                                    |
| 30 | Criminal*.mp.                                                                                                                                   |
| 31 | Jail*.mp.                                                                                                                                       |
| 32 | Incarcerat*.mp.                                                                                                                                 |
| 33 | correctional facility/                                                                                                                          |
| 34 | exp correctional facility/                                                                                                                      |
| 35 | convict*.mp.                                                                                                                                    |
| 36 | felon*.mp.                                                                                                                                      |
| 37 | exp offender/                                                                                                                                   |
| 38 | offender.mp.                                                                                                                                    |
| 39 | inmate*.mp.                                                                                                                                     |
| 40 | penitentiary*.mp.                                                                                                                               |
| 41 | gaol*.mp.                                                                                                                                       |
| 42 | 1 or 2 or 3 or 4 or 5 or 6 or 7 or 8 or 9 or 10 or 11 or 12 or 13 or 14 or 15 or 16 or 17 or 18 or 19 or 20 or 21 or 22 or 23 or 24 or 25 or 26 |

|                                                                                        |
|----------------------------------------------------------------------------------------|
| 27 or 28 or 29 or 30 or 31 or 32 or 33 or 34 or 35 or 36 or 37 or 38 or 39 or 40 or 41 |
| 42 and 43                                                                              |
| limit 44 to yr="2000 -Current"                                                         |

| <b><u>Social Sciences Citation Index Search Strategy</u></b>                                                                                                                                                                                                                                                                          |
|---------------------------------------------------------------------------------------------------------------------------------------------------------------------------------------------------------------------------------------------------------------------------------------------------------------------------------------|
| <b>#9 AND</b>                                                                                                                                                                                                                                                                                                                         |
| <b>#10 and 2000 or 2001 or 2002 or 2003 or 2004 or 2005 or 2022 or 2021 or 2020 or 2019 or 2018 or 2017 or 2016 or 2015 or 2014 or 2013 or 2012 or 2011 or 2010 or 2009 or 2008 or 2007 or 2006 (Publication Years)</b>                                                                                                               |
| <b>Prion* OR Prisoner* OR Jail* OR Incarcerat* OR "Correctional Facilities" OR Convict* OR felon* OR offender* OR inmate* OR penitentiary* OR gaol (Topic)</b>                                                                                                                                                                        |
| <b>"Palliative Care" OR "Terminal Care" OR Death OR "Terminally ill" OR "Hospice Care" OR "Pain Management" OR "Advance Directive*" OR "Advance Care Planning" OR Palliat* OR "end-of-life" OR "terminal illness" OR dying OR "end stage illness" OR "supportive care" OR "symptom management" OR "compassionate release" (Topic)</b> |
| <b>#5 AND #6</b>                                                                                                                                                                                                                                                                                                                      |
| <b>TS=(Prion* OR Prisoner* OR Criminal* OR Jail* OR Incarcerat* OR "Correctional Facilities" OR Convict* OR felon* OR offender* OR inmate* OR penitentiary* OR gaol OR secure )</b>                                                                                                                                                   |
| <b>TS=("Palliative Care" OR "Terminal Care" OR Death OR "Terminally ill" OR "Hospice Care" OR "Pain Management" OR "Advance Directive*" OR "Advance Care Planning" OR Palliat* OR "end-of-life" OR "terminal illness" OR dying OR "end stage illness" OR "supportive care" OR "symptom management" OR "compassionate release")</b>    |
| <b>#1 AND</b>                                                                                                                                                                                                                                                                                                                         |
| <b>#2 and 2000 or 2001 or 2002 or 2003 or 2004 or 2005 or 2006 or 2007 or 2008 or 2009 or 2010 or 2011 or 2012 or 2013 or 2014 or 2015 or 2016 or 2017 or 2018 or 2019 or 2020 or 2021 or 2022 (Publication Years)</b>                                                                                                                |
| <b>#1 AND #2</b>                                                                                                                                                                                                                                                                                                                      |

|                                                                                                                                                                                                                                                                                                                                      |
|--------------------------------------------------------------------------------------------------------------------------------------------------------------------------------------------------------------------------------------------------------------------------------------------------------------------------------------|
| <b>ALL=(Prion* OR Prisoner* OR Criminal* OR Jail* OR Incarcerat* OR 'Correctional Facilities' OR Convict* OR felon* OR offender* OR inmate* OR penitentiary* OR gaol OR secure )</b>                                                                                                                                                 |
| <b>TS=( 'Palliative Care' OR 'Terminal Care' OR Death OR 'Terminally ill' OR 'Hospice Care' OR 'Pain Management' OR 'Advance Directive*' OR 'Advance Care Planning' OR Palliat* OR 'end-of-life' OR 'terminal illness' OR dying OR 'end stage illness' OR 'supportive care' OR 'symptom management' OR 'compassionate release' )</b> |

| <b>PsyINFO Search Strategy</b> |                                                                                           |
|--------------------------------|-------------------------------------------------------------------------------------------|
| 1.                             | Palliative care.mp. or exp palliative therapy/                                            |
| 2.                             | Terminal Care.mp. or exp terminal care/                                                   |
| 3.                             | exp death/ or Death.mp.                                                                   |
| 4.                             | Terminally ill.mp. or exp terminally ill patient/                                         |
| 5.                             | Hospice Care.mp. or exp hospice care/                                                     |
| 6.                             | 'Pain management'.mp.                                                                     |
| 7.                             | 'Advance* Directive*'.mp.                                                                 |
| 8.                             | 'Advance* Care Planning'.mp. or exp advance care planning/                                |
| 9.                             | Palliat*.mp.                                                                              |
| 10.                            | 'end of life'.mp.                                                                         |
| 11.                            | 'end of life care'.mp.                                                                    |
| 12.                            | 'terminal illness'.mp. or exp terminal disease/                                           |
| 13.                            | dying.mp. or exp dying/                                                                   |
| 14.                            | 'end stage illness'.mp.                                                                   |
| 15.                            | 'supportive care'.mp.                                                                     |
| 16.                            | 'symptom management'.mp.                                                                  |
| 17.                            | 'compassionate release'.mp.                                                               |
| 18.                            | 1 or 2 or 3 or 4 or 5 or 6 or 7 or 8 or 9 or 10 or 11 or 12 or 13 or 14 or 15 or 16 or 17 |
| 19.                            | Prison*.mp. or exp prison/ or exp prison nursing/ or exp prisoner/                        |
| 20.                            | Criminal*.mp. or exp criminal justice/ or exp criminal behavior/                          |

|     |                                                                      |
|-----|----------------------------------------------------------------------|
| 21. | Jail*.mp.                                                            |
| 22. | exp incarceration/ or Incarcerat*.mp.                                |
| 23. | 'Correctional Facilities'.mp. or exp correctional facility/          |
| 24. | convict*.mp.                                                         |
| 25. | felon*.mp.                                                           |
| 26. | exp offender/ or offender*.mp.                                       |
| 27. | inmate*.mp.                                                          |
| 28. | penitentiary*.mp.                                                    |
| 29. | gaol*.mp.                                                            |
| 30. | secure.mp.                                                           |
| 31. | 19 or 20 or 21 or 22 or 23 or 24 or 25 or 26 or 27 or 28 or 29 or 30 |
| 32. | 18 and 31                                                            |
